# Supplementary material for: Inhibitory Effect of Paquinimod on a Murine Model of Neutrophilic Asthma Induced by Ovalbumin with Complete Freund’s Adjuvant
Source: Hindawi journal article supplement (doi:10.1155/2021/8896108), 2021-03-15

## Supplemental Figure 1

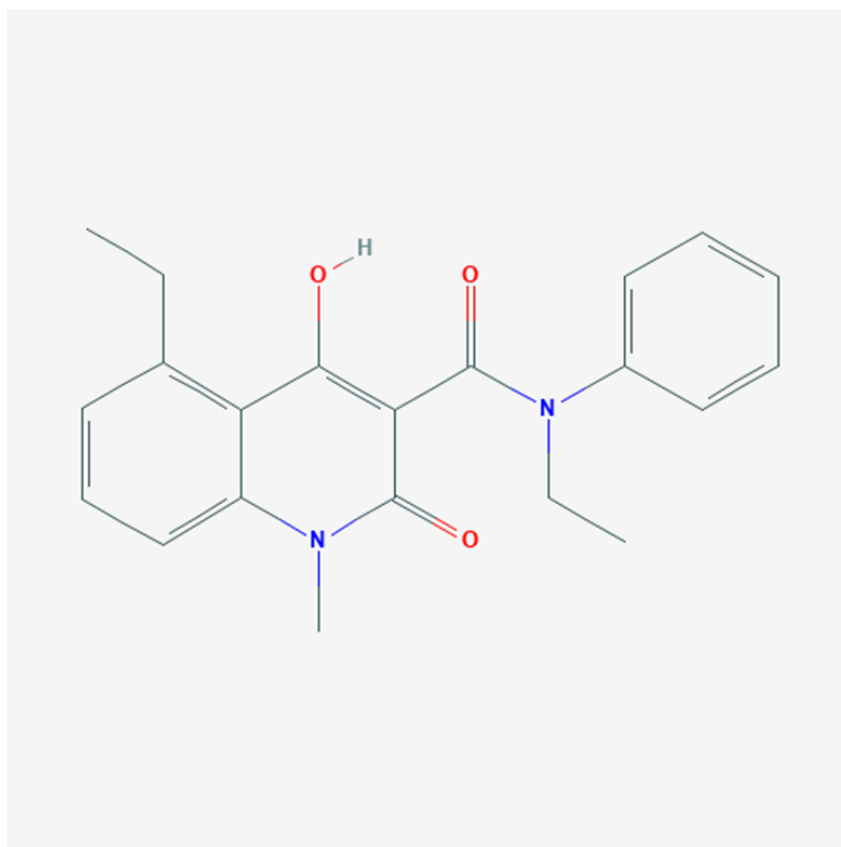

## Supplemental Figure 2

**-Neutrophilic asthma model using C57BL mice(OVA/CFA) and treatment with paquinimod**

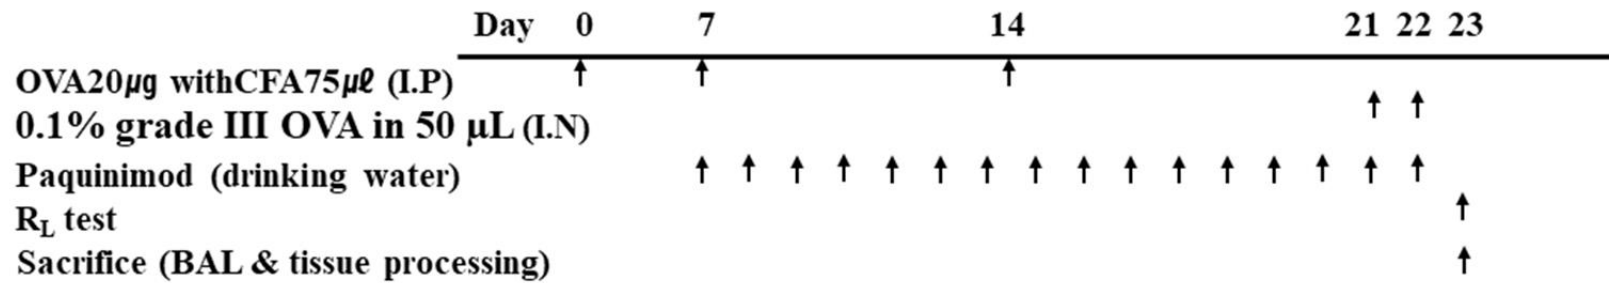

### Supplemental Figure 3

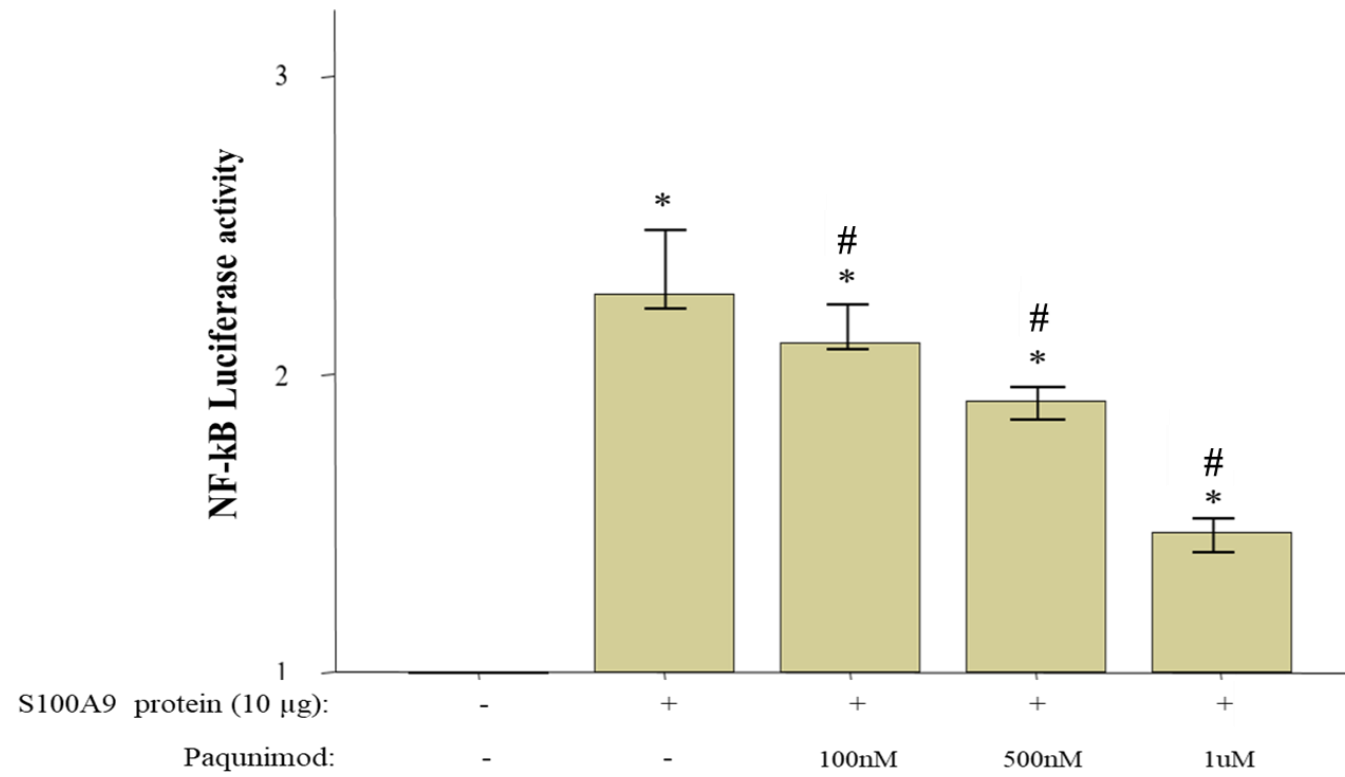

Supplement: f1 [file 8896108.f1.pdf]
